# Supplementary material for: Mechanistic Insights into Passive Membrane Permeability of Drug-like Molecules from a Weighted Ensemble of Trajectories
Source: PubMed Central journal article supplement — J Chem Inf Model. 2022 Apr 14;62(8):1891–904. doi: 10.1021/acs.jcim.1c01540 (PMC9044451; doi:10.1021/acs.jcim.1c01540), 2022-04-14
Supplement: ci1c01540_si_001.pdf [file ci1c01540_si_001.pdf]

*Supplementary Information for*

**Mechanistic Insights into Passive Membrane Permeability of Drug-Like Molecules from a Weighted Ensemble of Trajectories**

She Zhang<sup>1</sup>, Jeff P. Thompson<sup>1</sup>, Junchao Xia<sup>1</sup>, Anthony T. Bogetti<sup>2</sup>, Forrest York<sup>1</sup>, A. Geoffrey Skillman<sup>1</sup>, Lillian T. Chong<sup>\*,2</sup>, David N. LeBard<sup>\*,1</sup>

\* To whom correspondence should be addressed

<sup>1</sup>OpenEye Scientific, Santa Fe, NM 87508

<sup>2</sup>Department of Chemistry, University of Pittsburgh, Pittsburgh, PA 15260

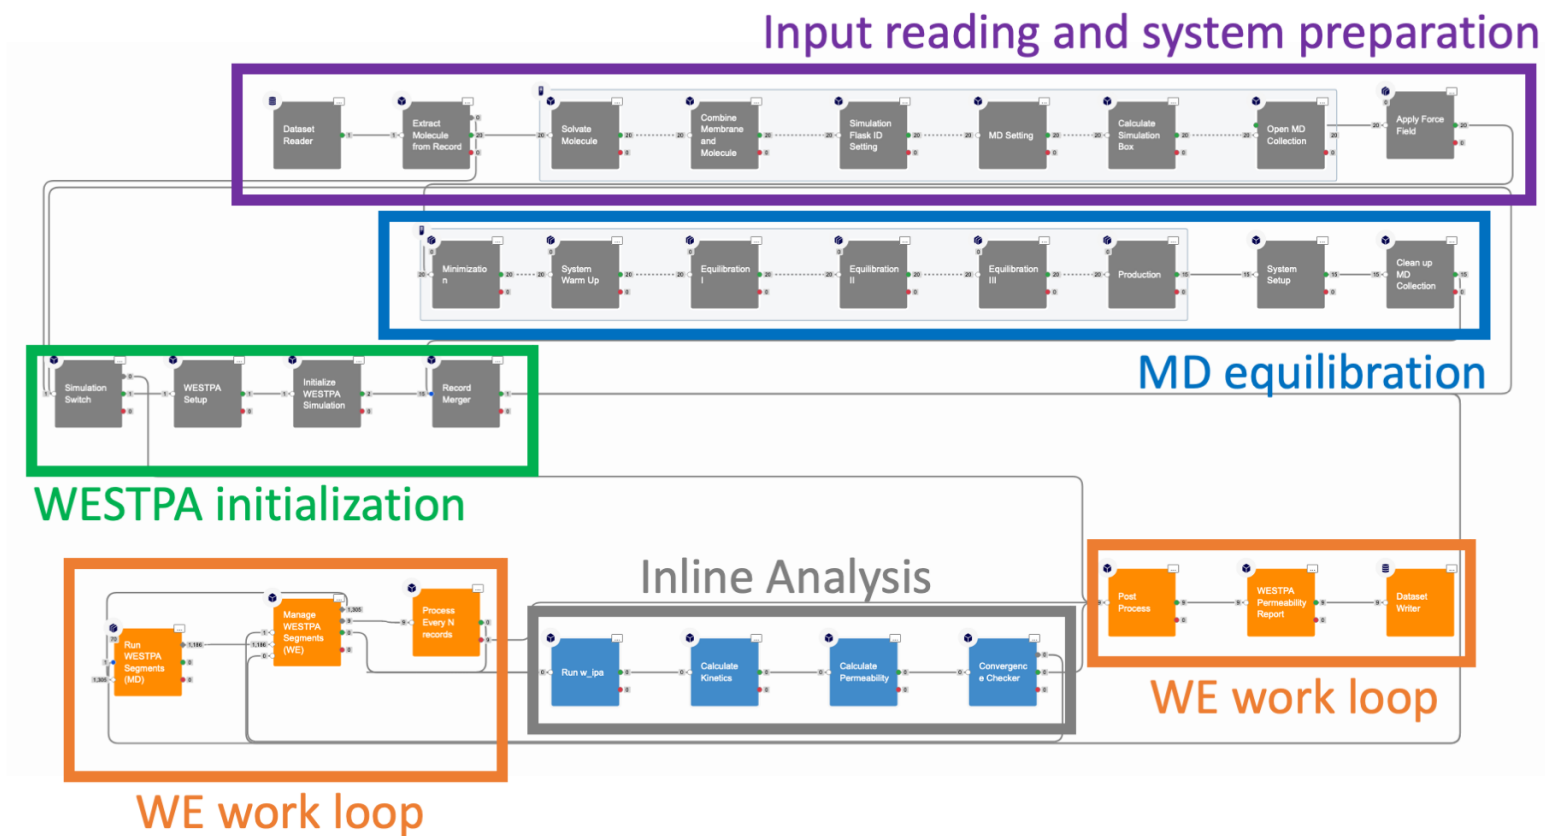

**Figure S1. Structural layout of the OpenEye Permeability Floe**, which can be broken into 5 logical phases: (1) Preparation of input the permeate system (purple); (2) Equilibration using a standard MD protocol of the aqueous ligand/membrane system (blue); (3) Initialization of the WESTPA toolkit (green); (4) Loop of segment trajectory splitting/recycling events using the WE algorithm, and output trajectory storage (orange); (5) Inline analysis of the permeability simulation for kinetics and convergence criteria (gray).

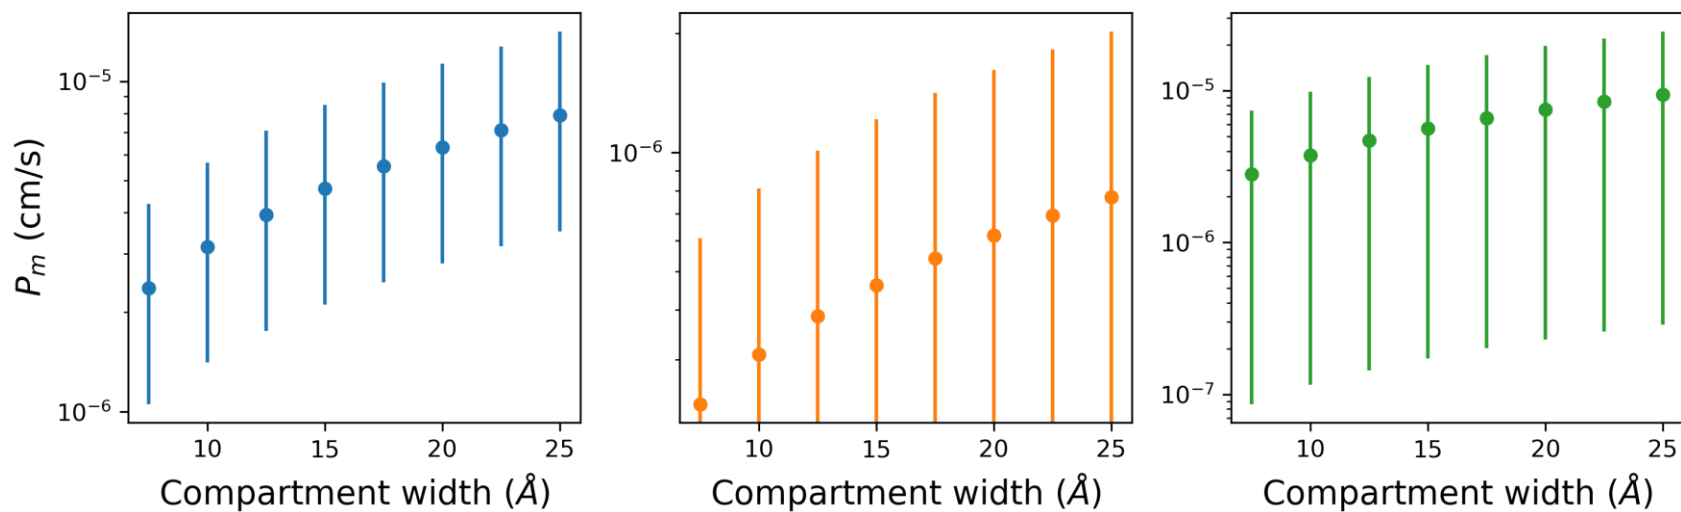

**Figure S2. The estimated permeability as a function of the compartment width.** The upper limit, 25 Å, is the full length of the water compartment in our simulation ( $(L_z - 40\text{Å})/2$ ). The lower limit, 7.5 Å, roughly corresponds to the thickness of the water layer near the membrane surface.

### Permeability - Run Permeability Simulation (GPU) (Permeability)

A floe to calculate the passive membrane permeability of a drug-like molecule on GPUs

**Job Properties**

Name:

Email me when this job completes:  Yes

Output path: *The folder where this job's output will be saved*

**Job Cost Limits** Email: not set Terminate: not set

**Promoted Parameters**

**Inputs**

Required input parameters

Input Dataset: *The dataset(s) to read records from*  \* Value is required

**Outputs**

Required output parameters

Output Dataset:  \* Value is required

**System Preparation Parameters**

**Weighted Ensemble Parameters**

Number Of Basis States:  *A set of Omega conformers used as input to permeability*

MAB:  On *Whether enable the Minimal, Adaptive Binning (MAB) scheme*

Iteration Interval (Tau):  *Length of each WESTPA iteration in picoseconds*

Iterations:  *Number of iterations for the WESTPA simulation*

Restart Simulation:  Off *Restart (instead of continue) the simulation if it is unfinished*

Reweighting:  On *Whether or not reweighting of the walkers should occur to reduce the relaxation time in steady-state simulations.*

Convergence Detection:  Off *Whether or not automatically detect convergence of the simulation.*

**Advanced Weighted Ensemble Parameters**

**Miscellaneous Parameters**

Show cube parameters:  No

**Figure S3. The Floe setup GUI of the OpenEye Permeability Floe.** All the parameters have a brief description of their function and are grouped with other parameters of the same component (e.g., system preparation, WE simulation, etc.) for easier navigation on the user's end.

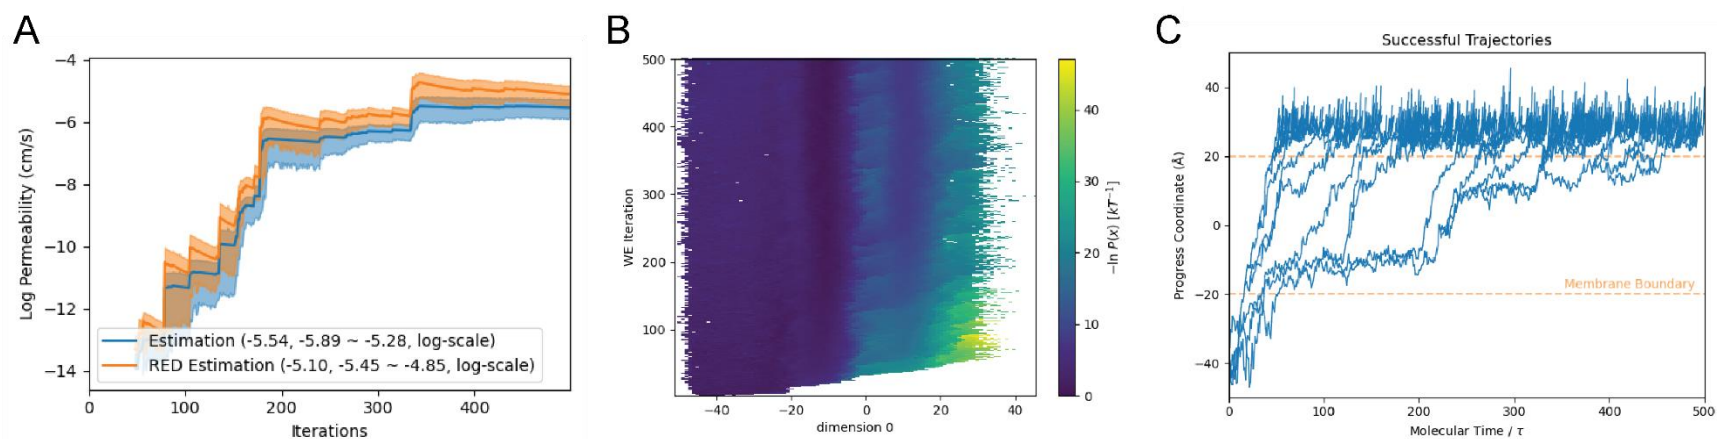

**Figure S4. Simulation report figures generated by OpenEye Permeability Floe.** **A)** The time (iteration=molecular time/ $\tau$ ) evolution of the permeability estimate (*blue*) and that estimated using RED (*orange*). The curves represent the mean estimates, and the shaded areas represent 95% CI. **B)** The time evolution of the probability distribution (in units of  $k_B T$ ). **C)** All the recycled trajectories in the regular WE with fixed binning scheme run represented by the progress coordinate,  $z$  (y-axis), versus the molecular time in terms of the number of iterations (x-axis).

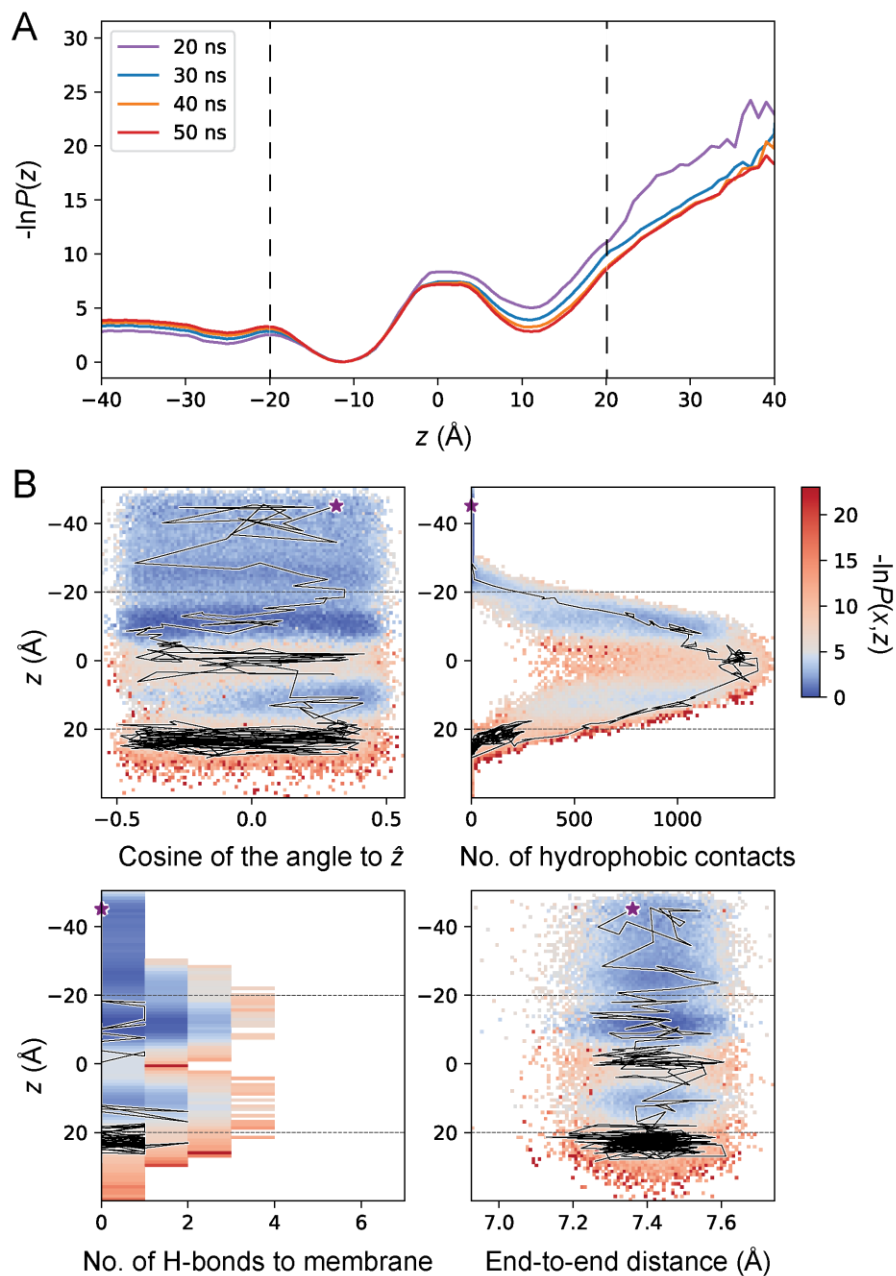

**Figure S5. The original, unsymmetrized (inverted) probability distribution along the lipid normal ( $\hat{z}$ ) for tacrine using the reweighting WE protocol (WESS). Note that, due to the recycling condition imposed by the WE steady-state protocol, this is not a free energy profile. See [Figure 3](#) legend for details.**

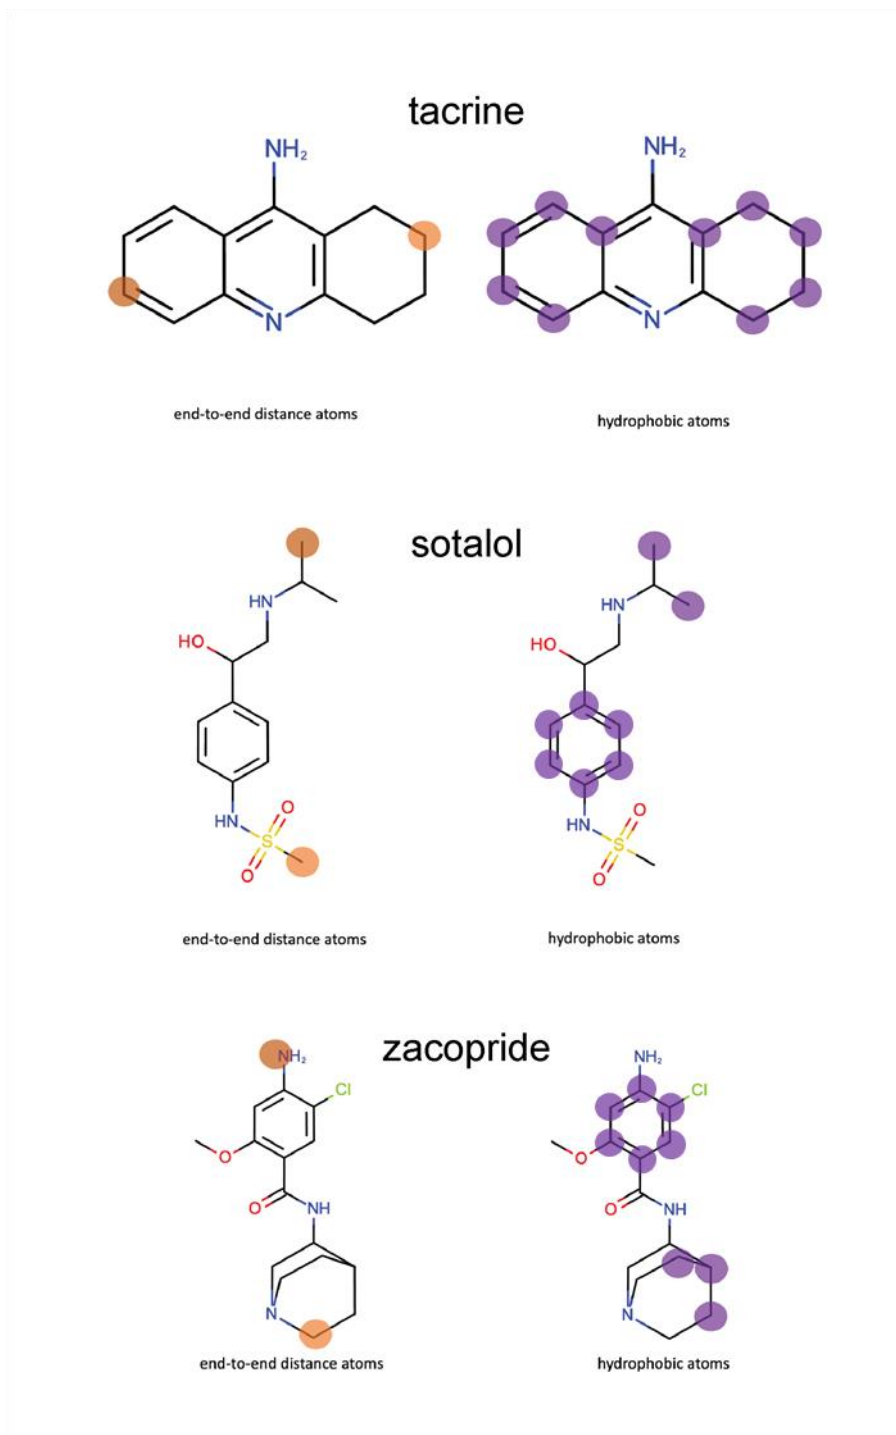

**Figure S6. Chemical structures of tacrine, sotalol, and zacopride.** Atoms that were chosen to calculate the end-to-end distances were marked by orange circles, and the hydrophobic carbons were marked by purple circles.

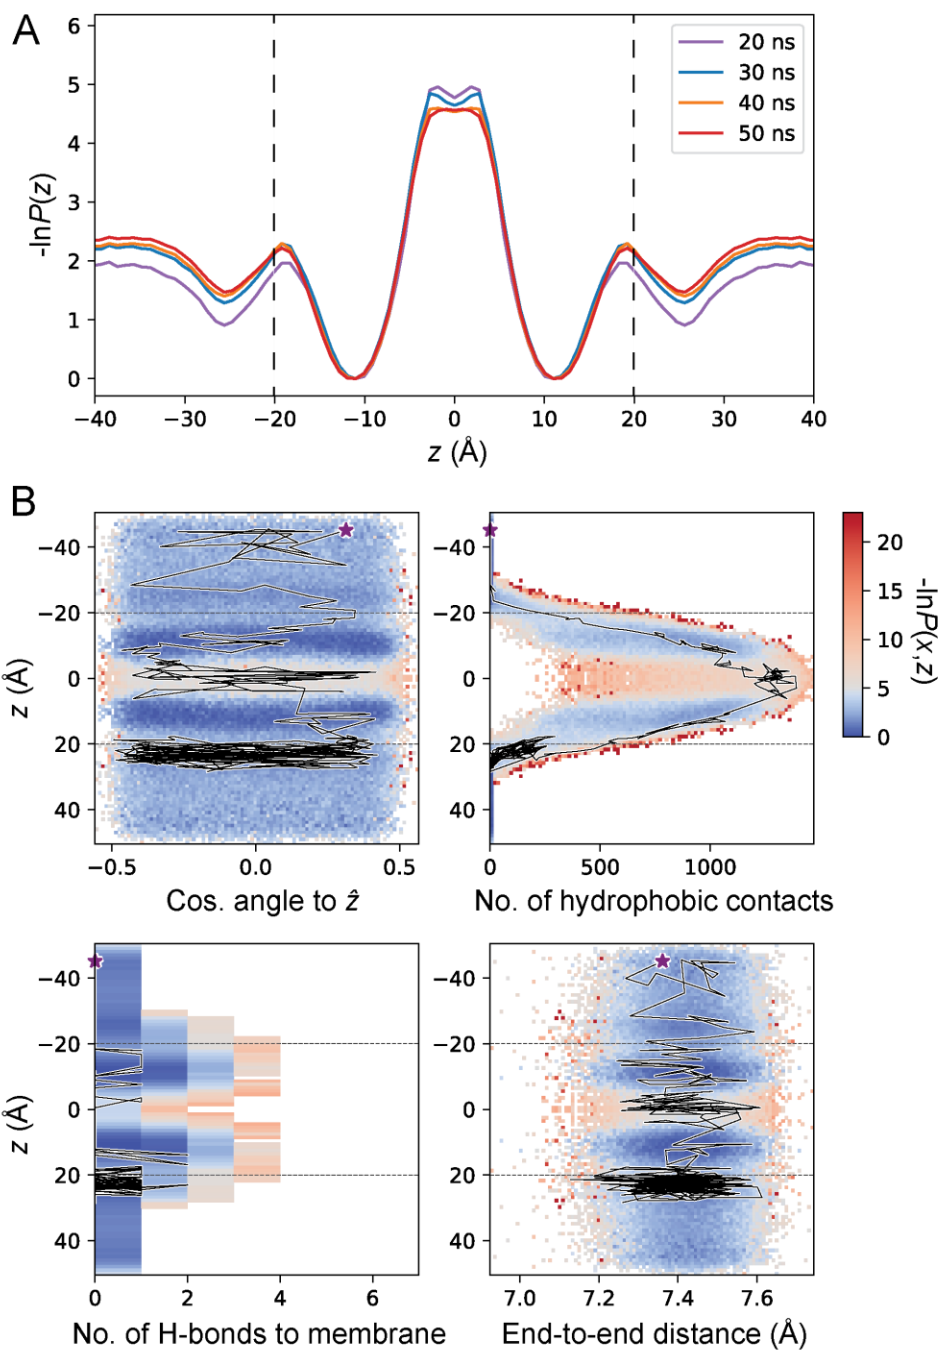

**Figure S7.** Free energy profiles along the lipid normal ( $\hat{z}$ ) and auxiliary coordinates for tacrine using the MAB scheme and reweighting WE protocol (MAB + WESS). See [Figure 3](#) legend for details.



**Table S1. Predicted and experimentally determined permeabilities.**

| <b>Compound</b> | <b>MAB Adaptive binning</b> | <b>WESS Reweighting</b> | <b>Platform</b> | <b>Predicted Log <math>P_m</math> (cm/s)</b> | <b>Expt. Log <math>P_m</math> (cm/s)</b> |
|-----------------|-----------------------------|-------------------------|-----------------|----------------------------------------------|------------------------------------------|
| Tacrine         |                             |                         | GPU             | $-5.54 \pm 0.13$                             | -4.64,<br>-5.03 $\pm$ 0.2,               |
|                 |                             | ×                       | GPU             | $-3.23 \pm 0.09$                             |                                          |
|                 | ×                           |                         | GPU             | $-6.96 \pm 0.16$                             |                                          |
|                 | ×                           | ×                       | GPU             | $-4.27 \pm 0.24$                             |                                          |
|                 | ×                           | ×                       | CPU             | $-5.20 \pm 0.28$                             |                                          |
| Sotalol         | ×                           | ×                       | GPU             | $-5.32 \pm 0.22$                             | -6.02,<br>-5.58 (TtoB),<br>-6.74 (BtoT)  |
| Zacopride       | ×                           | ×                       | GPU             | $-6.35 \pm 0.22$                             | -5.23                                    |
